# Supplementary material
Source: PubMed Central journal article supplement (PMC3880643)

## SUPPORTING INFORMATION

### Discovery of an *in vivo* Chemical Probe of the Lysine Methyltransferases G9a and GLP

Feng Liu, Dalia Barsyte-Lovejoy, Fengling Li, Yan Xiong, Victoria Korboukh, Xi-Ping Huang,

Abdellah Allali-Hassani, William P. Janzen, Bryan L. Roth, Stephen V. Frye, Cheryl H.

Arrowsmith, Peter J. Brown, Masoud Vedadi, and Jian Jin\*

#### Table of Contents

|    |                                                                                                  |    |
|----|--------------------------------------------------------------------------------------------------|----|
| A. | Table S1: Selectivity of inhibitor <b>7</b> versus 50 kinases .....                              | S2 |
| B. | Table S2: Selectivity of inhibitor <b>7</b> versus 44 GPCRs, ion channels and transporters ..... | S3 |
| C. | Table S3: Binding affinity of inhibitor <b>7</b> for selected GPCRs.....                         | S4 |
| D. | Table S4: Methyltransferase assay components and conditions .....                                | S5 |
| E. | <sup>1</sup> H NMR spectrum of inhibitor <b>7</b> .....                                          | S6 |
| F. | <sup>13</sup> C NMR spectrum of inhibitor <b>7</b> .....                                         | S7 |
| G. | <sup>1</sup> H NMR spectrum of inhibitor <b>13</b> .....                                         | S8 |
| H. | <sup>13</sup> C NMR spectrum of inhibitor <b>13</b> .....                                        | S9 |

**Table S1. Selectivity of inhibitor 7 versus 50 kinases.\***

| <b>kinase</b>  | <b>%inhibition</b> | <b>Kinase</b>                          | <b>%inhibition</b> | <b>Kinase</b> | <b>%inhibition</b> |
|----------------|--------------------|----------------------------------------|--------------------|---------------|--------------------|
| ABL            | -4                 | TIE2                                   | -5                 | JNK2          | -19                |
| CSK            | 7                  | TRKA                                   | 1                  | MAPKAPK2      | -2                 |
| EGFR           | -5                 | TYRO3                                  | -2                 | MST1          | -10                |
| EPHA2          | -7                 | AKT1                                   | -24                | NEK2          | -5                 |
| EPHB4          | -2                 | AMPK $\alpha$ 1/ $\beta$ 1/ $\gamma$ 1 | 10                 | p38 $\alpha$  | 4                  |
| FGFR1          | -10                | AurA                                   | 4                  | p70S6K        | -22                |
| FLT3           | -1                 | CaMK4                                  | 3                  | PAK2          | 4                  |
| IGF1R          | -4                 | CDK2/CycA2                             | 1                  | PBK           | -8                 |
| ITK            | -4                 | CHK1                                   | -2                 | PDK1          | -1                 |
| JAK3           | -1                 | CK1 $\epsilon$                         | -5                 | PIM1          | -1                 |
| KDR            | -3                 | DAPK1                                  | -6                 | PKAC $\alpha$ | -7                 |
| LCK            | -1                 | DYRK1B                                 | -1                 | PKC $\alpha$  | 4                  |
| MET            | -7                 | Erk2                                   | 2                  | PKD2          | -6                 |
| PDGFR $\alpha$ | -1                 | GSK3 $\beta$                           | -9                 | ROCK1         | -21                |
| PYK2           | 1                  | HGK                                    | -6                 | SGK           | 1                  |
| SRC            | 1                  | IKK $\beta$                            | -4                 | TSSK1         | -1                 |
| SYK            | -4                 | IRAK4                                  | -12                |               |                    |

\*% inhibition at 10  $\mu$ M

**Table S2. Selectivity of inhibitor 7 versus 44 GPCRs, ion channels and transporters.\***

| <b>Targets</b> | <b>%inhibition</b> | <b>Targets</b>        | <b>%inhibition</b> | <b>Targets</b>        | <b>%inhibition</b> |
|----------------|--------------------|-----------------------|--------------------|-----------------------|--------------------|
| 5-HT1A         | 22                 | $\alpha$ 2B           | 6                  | H3                    | 93                 |
| 5-HT1B         | 9                  | $\alpha$ 2C           | 67                 | H2                    | 31                 |
| 5-HT1D         | 17                 | $\beta$ 1             | -8                 | $\kappa$ opioid       | 7                  |
| 5-HT1E         | 20                 | $\beta$ 2             | -11                | M1                    | 48                 |
| 5-HT2A         | 4                  | $\beta$ 3             | -10                | M2                    | 48                 |
| 5-HT2B         | -8                 | BZP Rat<br>Brain Site | 39                 | M3                    | 26                 |
| 5-HT2C         | 22                 | D1                    | 25                 | M4                    | -4                 |
| 5-HT3          | -1                 | D2                    | -8                 | M5                    | -7                 |
| 5-HT5A         | -4                 | D3                    | 22                 | $\mu$ opioid          | 74                 |
| 5-HT6          | 1                  | D4                    | 12                 | NET                   | 41                 |
| 5-HT7          | 26                 | D5                    | 17                 | PBR                   | 34                 |
| $\alpha$ 1A    | 44                 | DAT                   | 18                 | SERT                  | 1                  |
| $\alpha$ 1B    | 19                 | $\delta$ opioid       | 5                  | $\sigma$ <sub>1</sub> | 3                  |
| $\alpha$ 1D    | 59                 | GABAA                 | -3                 | $\sigma$ <sub>2</sub> | 53                 |
| $\alpha$ 2A    | 16                 | H1                    | 6                  |                       |                    |

\*% inhibition at 1  $\mu$ M

**Table S3. Binding affinity of inhibitor 7 for selected GPCRs.**

| <b>Target</b>             | $\alpha_{1D}$ | $\alpha_{2C}$ | H <sub>3</sub> | $\mu$ opioid | $\sigma_2$ |
|---------------------------|---------------|---------------|----------------|--------------|------------|
| <b>K<sub>i</sub> (nM)</b> | 4,500         | > 10,000      | 45             | > 10,000     | 900        |

**Table S4. Methyltransferase assay components and conditions.**

| <b>Methyltransferase</b> | <b>Protein (nM)</b> | <b>SAM (<math>\mu</math>M)</b> | <b>Peptide</b>  | <b>Peptide (<math>\mu</math>M)</b> | <b>Assay method</b> | <b>Incubation time (h)</b> |
|--------------------------|---------------------|--------------------------------|-----------------|------------------------------------|---------------------|----------------------------|
| PRMT3                    | 100                 | 20                             | H4 (1-24)       | 7                                  | SPA                 | 1                          |
| PRMT5-MEP50              | 15                  | 2                              | H4 (1-24)       | 0.12                               | SPA                 | 1                          |
| SETD8                    | 50                  | 60                             | H4 (1-24)       | 40                                 | SPA                 | 1                          |
| SETD7                    | 20                  | 2                              | H3 (1-25)       | 2                                  | SPA                 | 0.5                        |
| G9a                      | 5                   | 8                              | H3 (1-25)       | 0.8                                | SPA                 | 0.25                       |
| GLP                      | 5                   | 8                              | H3 (1-25)       | 0.6                                | SPA                 | 0.25                       |
| SETDB1                   | 20                  | 15                             | H3 (1-25)       | 1.7                                | SPA                 | 0.25                       |
| SUV39H2                  | 10                  | 3                              | H3 (1-25)       | 0.5                                | SPA                 | 0.25                       |
| MLL1 complex             | 20                  | 2                              | H3 (1-25)       | 2                                  | SPA                 | 1                          |
| PRC2 complex             | 20                  | 2                              | H3 (21-44)      | 1                                  | SPA                 | 1                          |
| SUV420H1                 | 500                 | 12                             | H4 (1-24)K20Me1 | 3                                  | SPA                 | 1                          |
| SUV420H2                 | 1000                | 9                              | H4 (1-24)K20Me1 | 1                                  | SPA                 | 1                          |
| SMYD2                    | 30                  | 0.5                            | P53 (361-380)   | 3                                  | SPA                 | 1                          |
| SMYD3                    | 1000                | 10                             | H3-H4 tetramer  | 1                                  | Filter plate        | 1                          |
| DOT1L                    | 10                  | 1                              | Nucleosome      | 1                                  | Filter plate        | 1                          |
| DNMT1                    | 100                 | 2                              | dsDNA           | 0.6                                | SPA                 | 0.5                        |

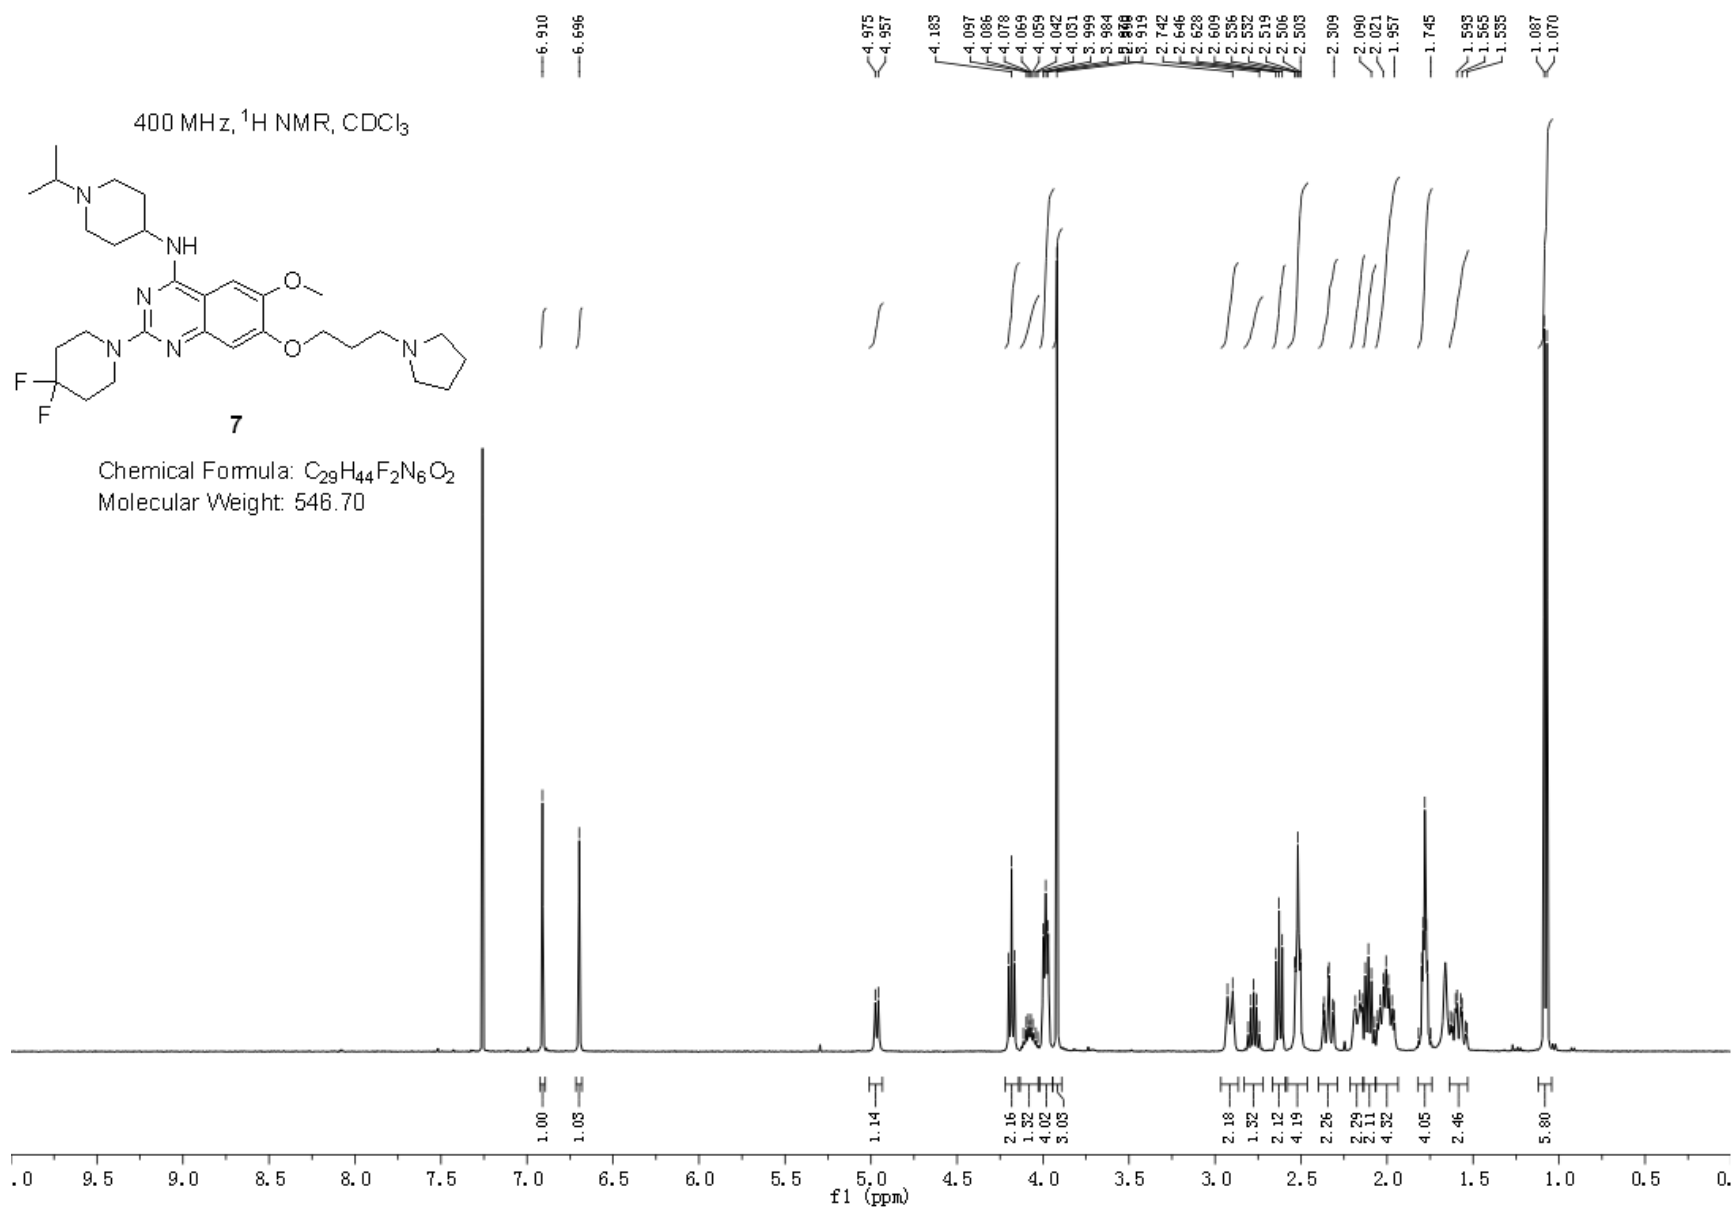

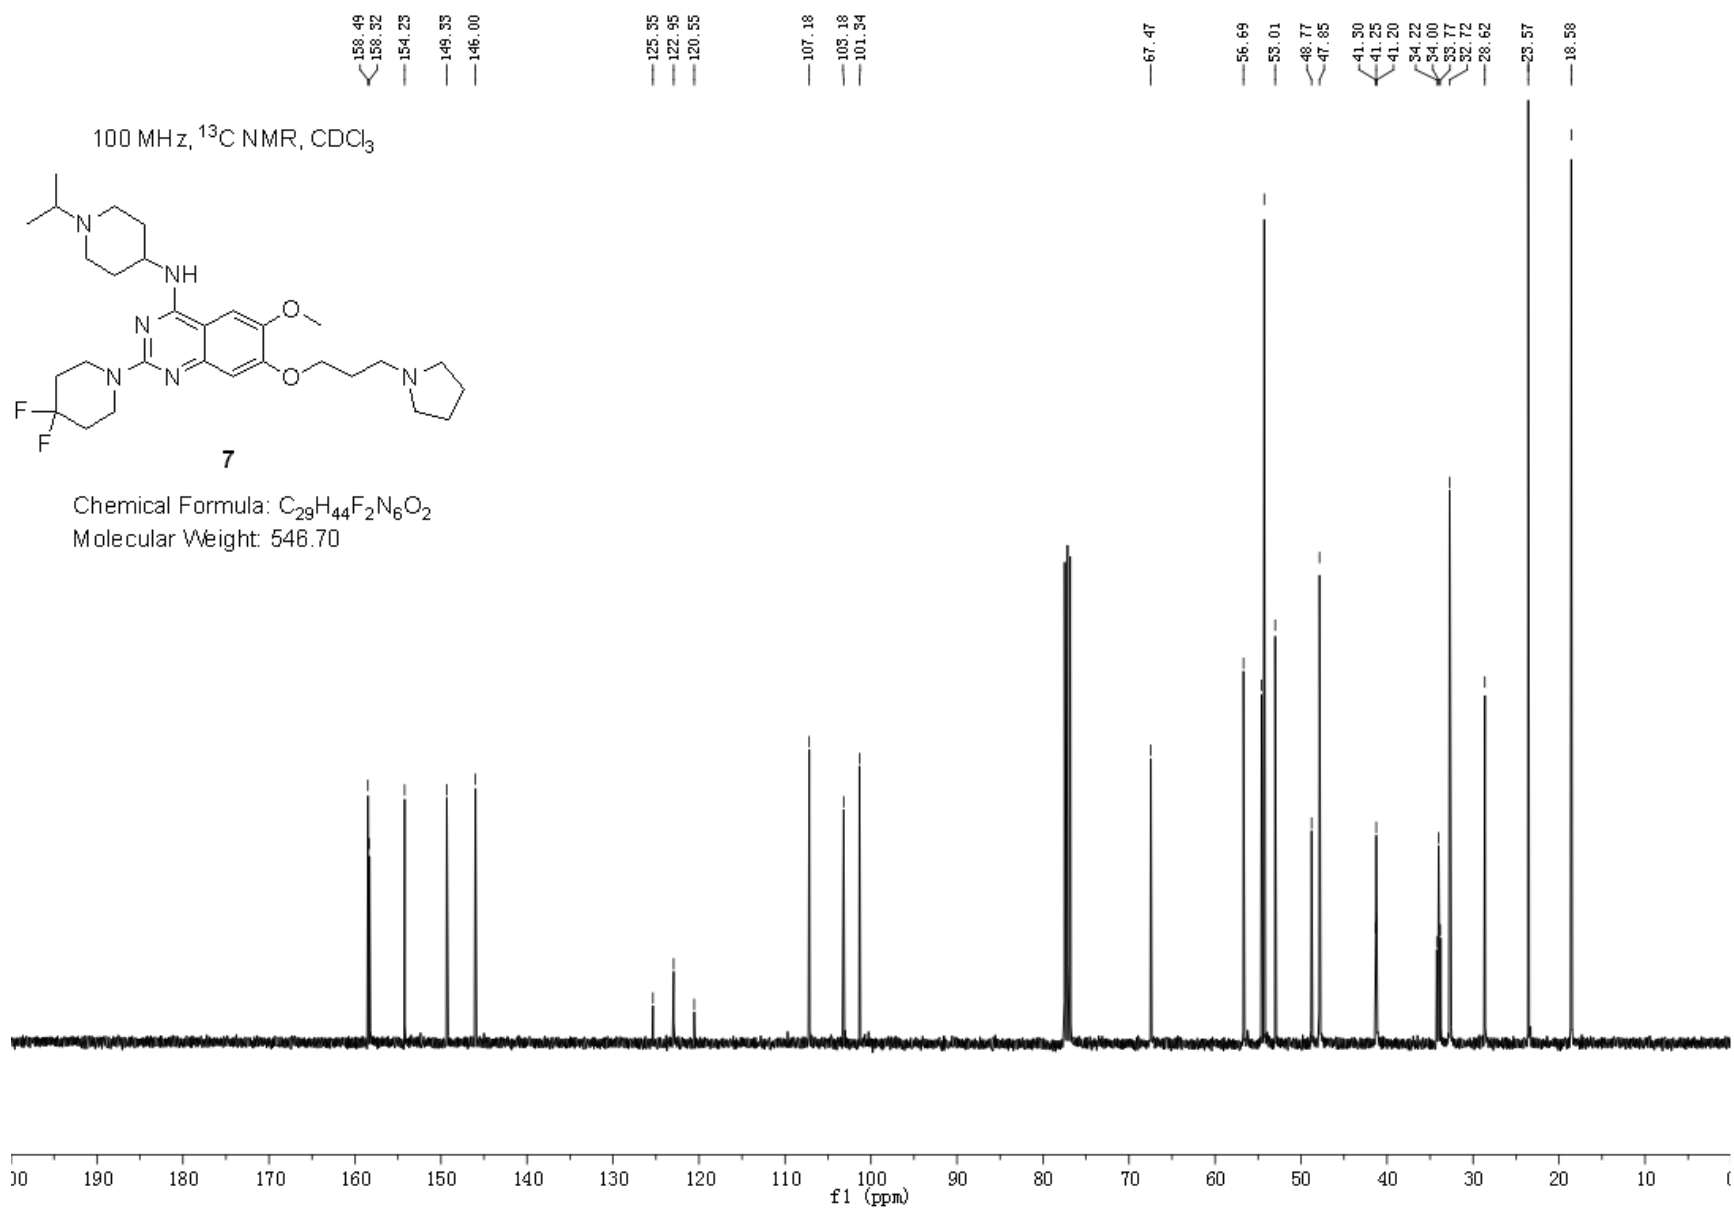

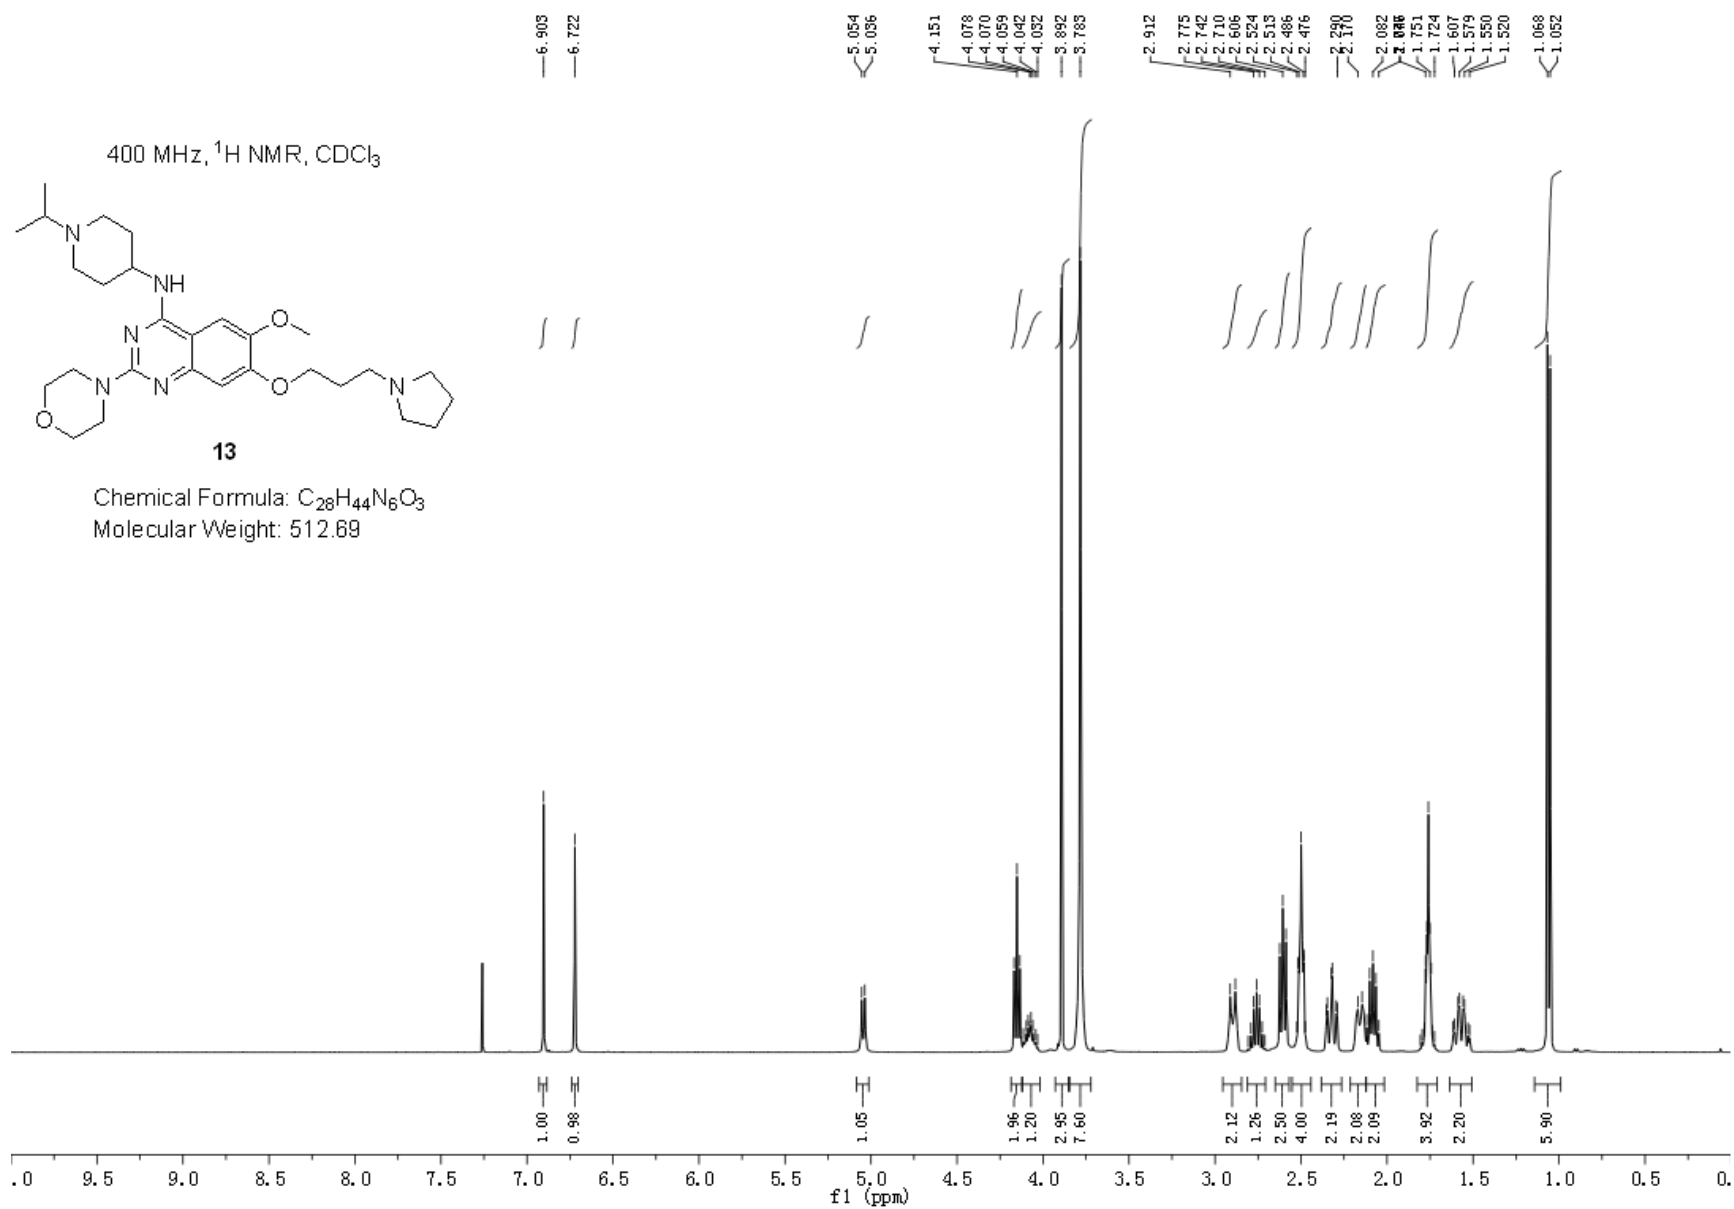



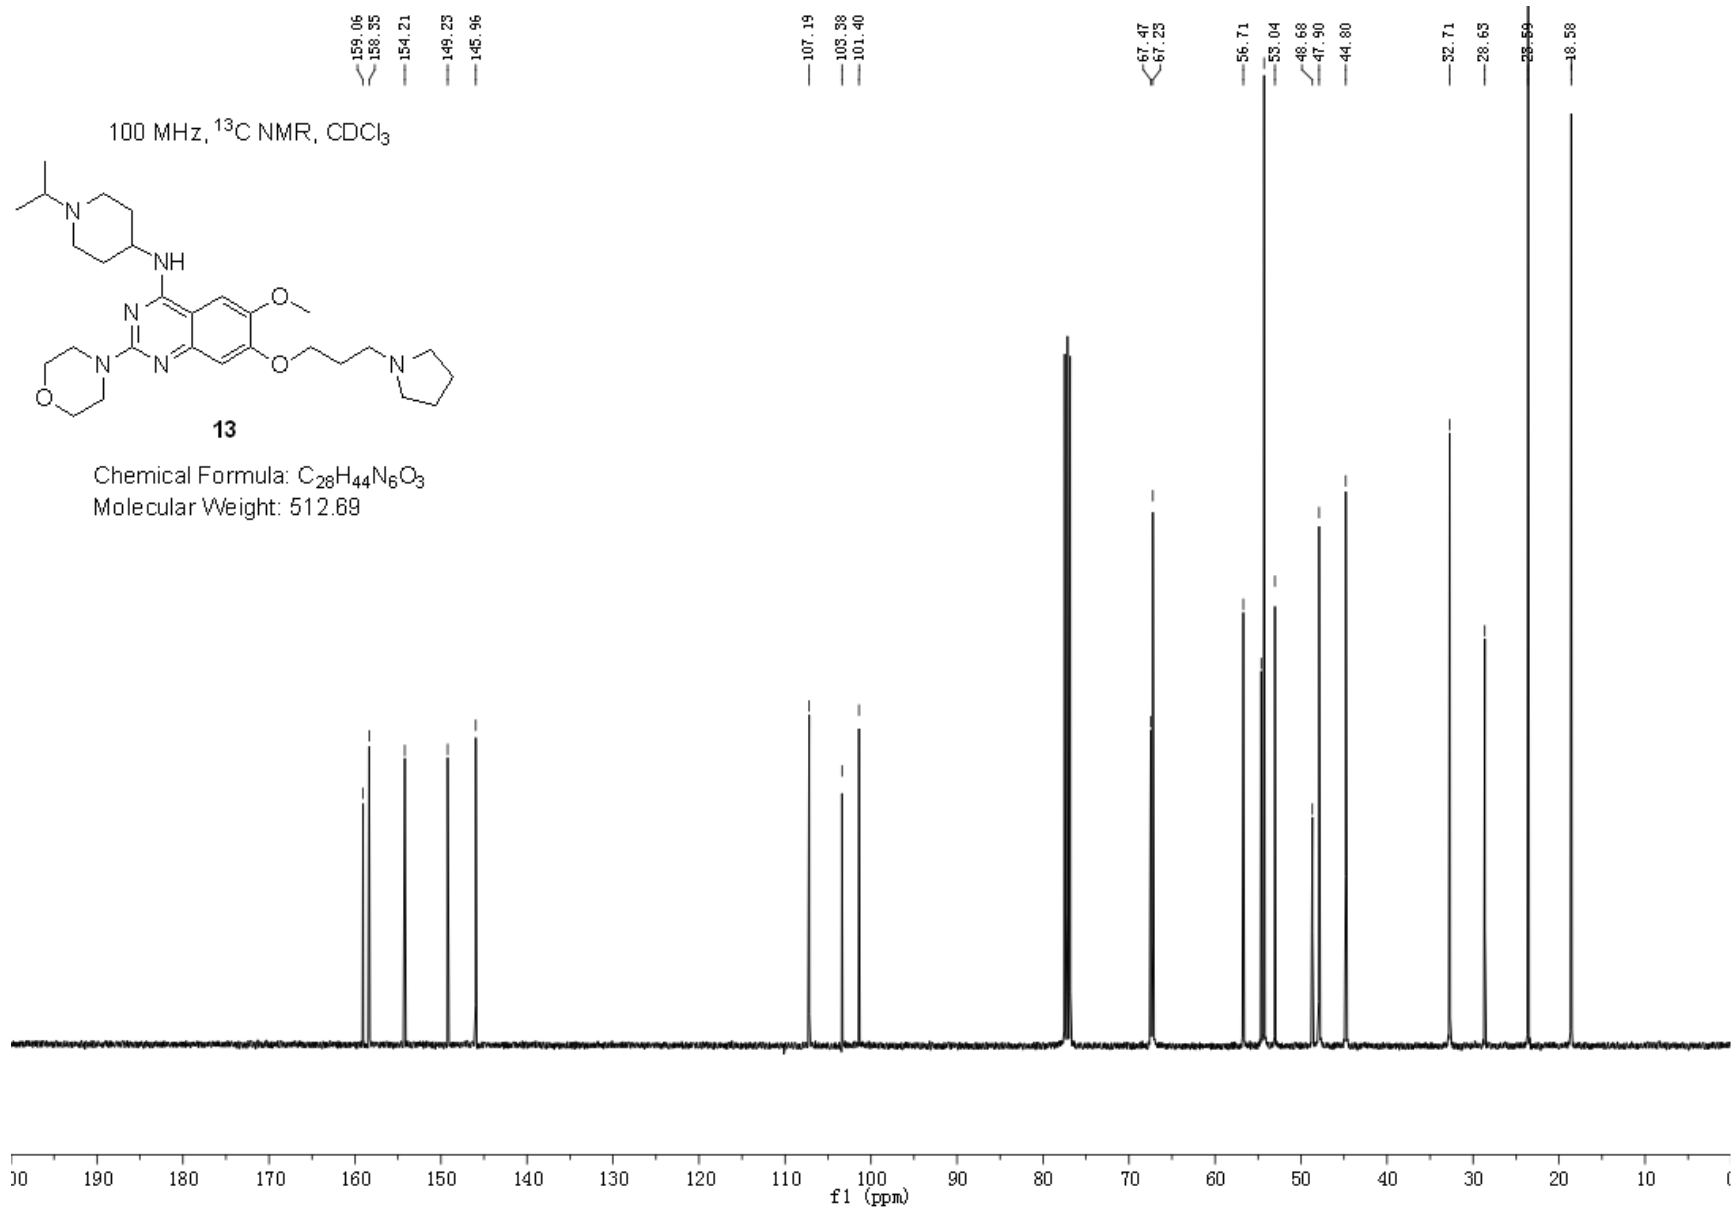

Supplement: NIHMS536988-supplement-1_si_001.pdf [file NIHMS536988-supplement-1_si_001.pdf]
